# Supplementary material for: miRTil: An Extensive Repository for Nile Tilapia microRNA Next Generation Sequencing Data
Source: MDPI journal article supplement (doi:10.3390/cells9081752), 2020-07-22
Supplement: s1 [file s1]

*Supplementary Figure S1. Distribution of TargetScan Context+ scores of predicted miRNA interactions.* Context+ Scores of miRNAs interactions from Nile Tilapia were obtained by TargetScan v6.0 using data from Ensembl database v.79 and miRNAs identified in Pinhal and Bovolenta *et al.* ([Pinhal and Bovolenta \*et al.\*, 2018](#)).

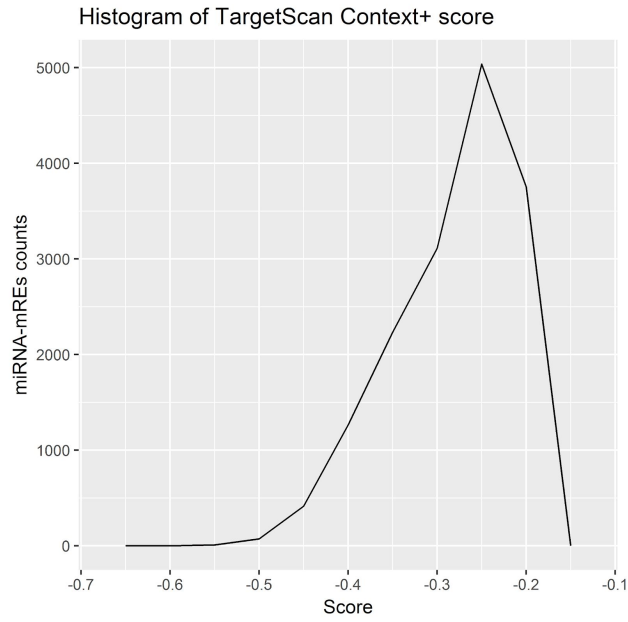

*Supplementary. Figure S2. Degree distribution of nodes from predicted Nile tilapia miRNA-mRNA interactions network.* The degree distribution is the probability distribution of the number of connections nodes has to other nodes over the whole network.

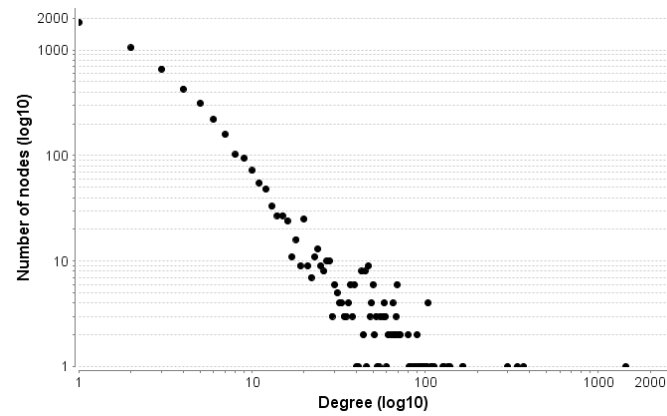

*Supplementary Figure S3. Example of the genomic location search mechanism in advanced search page.* Users could retrieve miRNA genes using genomic window through correspondent scaffold or LG from Nile Tilapia genome and the range of start-end coordinates.

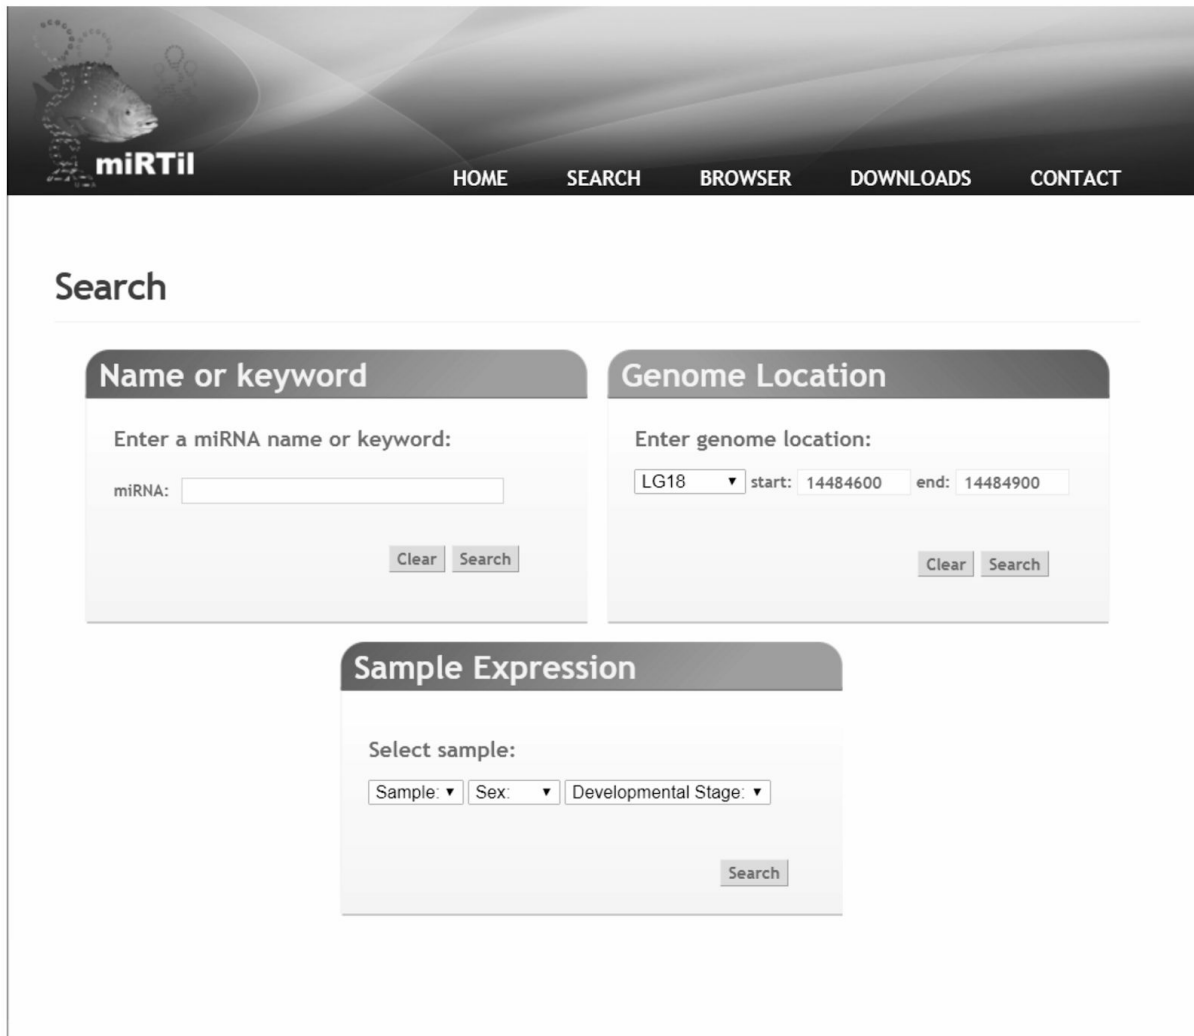

The screenshot displays the miRTil web application interface. At the top, there is a header with the miRTil logo (a fish with a DNA helix) and navigation links: HOME, SEARCH, BROWSER, DOWNLOADS, and CONTACT. Below the header, the main content area is titled "Search". It contains three distinct search modules:

- Name or keyword:** A section with the prompt "Enter a miRNA name or keyword:". It features a text input field labeled "miRNA:" and two buttons, "Clear" and "Search".
- Genome Location:** A section with the prompt "Enter genome location:". It includes a dropdown menu currently showing "LG18", and two text input fields for "start:" (containing "14484600") and "end:" (containing "14484900"). It also has "Clear" and "Search" buttons.
- Sample Expression:** A section with the prompt "Select sample:". It contains three dropdown menus labeled "Sample:", "Sex:", and "Developmental Stage:". A "Search" button is positioned at the bottom right of this section.

*Supplementary Figure S4. Simple miRNA information resulted from the Genome location search mechanism. Page containing summarized miRNA information, such as miRNA ID, symbol and mature sequence as well as details on the genomic location, in this example to oni-mir-133a-1 and oni-mir-1-1.*



[HOME](#)
[SEARCH](#)
[BROWSER](#)
[DOWNLOADS](#)
[CONTACT](#)

**Results Chromosome: LG18 Start: 14480000 End: 14490000**

| id  | miR             | sequence               | strand | start    | end      | chromosome |
|-----|-----------------|------------------------|--------|----------|----------|------------|
| 306 | oni-miR-133a-5p | AGCTGGTAAATGGAACCAAAT  | -      | 14481126 | 14481194 | LG18       |
| 307 | oni-miR-133a-3p | TTGGTCCCCTTCAACCAGCTGT | -      | 14481126 | 14481194 | LG18       |
| 308 | oni-miR-1-5p-2  | ACATACTTCTTTATGTACCCAT | -      | 14484670 | 14484744 | LG18       |
| 309 | oni-miR-1-3p    | TGGAATGTAAAGAAGTATGTAT | -      | 14484670 | 14484744 | LG18       |

*Supplementary Figure S5. Example of sample search mechanism on the advanced search page. Users can retrieve miRNA genes expressed in 16 samples selecting the tissue or developmental stage, gender (male, female or sex mixed, described as "pool") and age of individuals.*

The screenshot displays the miRTil website's advanced search interface. The header features the miRTil logo and navigation links: HOME, SEARCH, BROWSER, DOWNLOADS, and CONTACT. The main content area is titled "Search" and contains three primary search sections:

- Name or keyword:** A section with the prompt "Enter a miRNA name or keyword:" and a text input field labeled "miRNA:". Below the input are "Clear" and "Search" buttons.
- Genome Location:** A section with the prompt "Enter genome location:" and a form for "Chr:" (a dropdown menu), "start:" (a text input), and "end:" (a text input). Below the inputs are "Clear" and "Search" buttons.
- Sample Expression:** A section titled "Select sample:" containing three dropdown menus for "White M", "Male", and "Adult". A "Sample:" dropdown menu is open, showing a list of tissues and developmental stages: Heart, White Muscle (highlighted), Eye, Red Muscle, Liver, Brain, Developmental Stage, and Gonads. A "Search" button is located to the right of the open dropdown.

*Supplementary Figure S6. miRNA information obtained by sample search mechanism.* Page containing summarized miRNA information, such as miRNA ID, symbol and mature sequence as well as genomic location, in this example are partially listed 42 miRNAs expressed on male white skeletal muscle of Nile tilapia adults.



[HOME](#)
[SEARCH](#)
[BROWSER](#)
[DOWNLOADS](#)
[CONTACT](#)

### Results Sample: White Muscle Sex: Male Developmental stage: Adult

| id | miR               | sequence                | strand | start  | end    | chromossome |
|----|-------------------|-------------------------|--------|--------|--------|-------------|
| 1  | oni-miR-736-5p    | CAGCTTTTGTGTTGATTATGT   | +      | 1002   | 1064   | UNK4522     |
| 2  | oni-miR-736-3p    | TGTAAGACGAACAAAAAGTTTG  | +      | 1002   | 1064   | UNK4522     |
| 3  | oni-miR-736-5p    | CAGCTTTTGTGTTGATTATGT   | +      | 1002   | 1064   | UNK4525     |
| 4  | oni-miR-736-3p    | TGTAAGACGAACAAAAAGTTTG  | +      | 1002   | 1064   | UNK4525     |
| 6  | oni-miR-107-3p    | AGCAGCATTGTACAGGGCTATC  | -      | 10823  | 10887  | LG13        |
| 7  | oni-miR-301b-5p   | GCTCTGACTTCATTGCACTACT  | -      | 60549  | 60616  | UNK482      |
| 8  | oni-miR-301b-3p   | TAGTGCAATAGTATTGTCAAAGC | -      | 60549  | 60616  | UNK482      |
| 10 | oni-miR-456-3p    | CAGGCTGGTTAGATGGTTGTC   | -      | 155059 | 155127 | UNK319      |
| 12 | oni-miR-200b-3p   | TAATACTGCCTGGTAATGATGAT | +      | 159832 | 159899 | UNK27       |
| 13 | oni-miR-200a-5p   | CATCTTACCCGACAGTGCTGGA  | +      | 160017 | 160085 | UNK27       |
| 14 | oni-miR-200a-3p   | TAACACTGTCTGGTAACGATGTT | +      | 160017 | 160085 | UNK27       |
| 15 | oni-miR-429a-3p   | TAATACTGTCTGGTAATGCCGT  | +      | 161402 | 161478 | UNK27       |
| 16 | oni-let-7d-5p     | TGAGGTAGTTGGTTGTATGGTT  | +      | 207591 | 207668 | UNK93       |
| 17 | oni-let-7d-3p     | CTGTACAACCTTCTAGCTTTCC  | +      | 207591 | 207668 | UNK93       |
| 18 | oni-miR-125a-5p   | TCCCTGAGACCCTTAACCTGTG  | +      | 213683 | 213753 | UNK93       |
| 19 | oni-miR-125a-3p   | ACAGGTGAGGTCTCGGGAAC    | +      | 213683 | 213753 | UNK93       |
| 20 | oni-miR-458-5p    | AGCGCCATTTTCAGAGCTAT    | -      | 268932 | 268995 | LG2         |
| 21 | oni-miR-458-3p    | ATAGCTCTTTAAATGGTACTGC  | -      | 268932 | 268995 | LG2         |
| 22 | oni-miR-142a-5p   | CATAAAGTAGAAAGCACTACT   | -      | 273761 | 273832 | UNK38       |
| 23 | oni-miR-142a-3p   | TGTAGTGTTTCTACTTTATGG   | -      | 273761 | 273832 | UNK38       |
| 25 | oni-miR-124a-3p   | TAAGGCACGCGGTGAATGC     | +      | 306513 | 306583 | UNK151      |
| 27 | oni-miR-124b-3p   | TCAAGGTCCAAGTGAACACTG   | -      | 306515 | 306577 | UNK151      |
| 30 | oni-miR-202-5p    | TTCCTATGCACATACTTCTTT   | +      | 376452 | 376515 | UNK81       |
| 32 | oni-miR-125b-5p   | TCCCTGAGACCCTAACTTGTG   | -      | 394944 | 395012 | LG14        |
| 33 | oni-miR-125b-3p-3 | ACGGGTTAGGCTCTCGGAGCT   | -      | 394944 | 395012 | LG14        |
| 34 | oni-let-7a-5p     | TGAGGTAGTAGGTTGTATAGTT  | -      | 400524 | 400595 | LG14        |
| 35 | oni-let-7a-3p-2   | CTGTACAACCTCCTAGCTTTCC  | -      | 400524 | 400595 | LG14        |
| 36 | oni-miR-100-5p    | AACCCGTAGATCCGAAC TTGTG | -      | 402006 | 402068 | LG14        |
| 37 | oni-miR-100-3p    | CAAGCTTGTATCTACAGGCTCG  | -      | 402006 | 402068 | LG14        |
| 38 | oni-miR-212-5p    | ACCTTGGCTTTAGACTGCTTACT | +      | 414689 | 414765 | UNK65       |
| 41 | oni-miR-132-3p-2  | TAACAATCTAAAGCCACGGTC   | -      | 415079 | 415144 | UNK65       |
| 42 | oni-miR-132-5p-2  | ACCGTGGCTTTAGATTGTTACT  | +      | 415081 | 415150 | UNK65       |

Supplementary Figure S7. Case study of miRNA with multiples samples or predicted targets detected. (A) Experimental details containing several miRNA expression evidence in multiple samples; (B) Regulatory details showing multiple computational predictions of miRNA-mRNA interactions using TargetScan v6.0.

A

Experiments details<sup>[hide]</sup>

Sample ID

1

Organism

*Oreochromis niloticus*

Sex

Pool

Developmental Stage

2 days

Tissue Type

Developmental Stage

miRs expression levels

326.4 RPM

Abstract

This experiment used Next-Generation Sequencing (RNAseq) and qPCR to detect and quantify miRs from a pool of embryos (n=20) at 2 days post-fertilization (2 dpf) of Nile tilapias.

Sample ID

2

Organism

*Oreochromis niloticus*

Sex

Pool

Developmental Stage

3 days

Tissue Type

Developmental Stage

miRs expression levels

2336.79 RPM

Abstract

This experiment used Next-Generation Sequencing (RNAseq) and qPCR to detect and quantify miRs from a pool of embryos (n=20) at 3 days post-fertilization (3 dpf) of Nile tilapias.

B

Regulatory details<sup>[hide]</sup>

Target mRNA

miRNA ID

ENSOHIG00000019302|ENSOHIT00000024314

mRNA

sned1-202  
sushi, nidogen and EGF-like domains 1  
[Source:ZFIN;Acc:ZDB-GENE-100913-1]

Transcriptome detection

Study.SRP009911; EYE TESTIS

Prediction

TargetScan(v.6):  
Site-type contribution: 8mer-1a  
Context+ score: -0.387  
3' AGGGAATC-CCTGTTGGACGTCG 5' (3'UTR)  
||||| |||||  
5' TCCCTGAGACCTTAACCTGTG 3' (miRNA)

miRNA ID

ENSOHIG000000006687|ENSOHIT000000008451

mRNA

prdm1a-201  
PR domain containing 1a, with ZNF domain  
[Source:ZFIN;Acc:ZDB-GENE-030131-2193]

Transcriptome detection

Study.SRP009911;

Prediction

TargetScan(v.6):  
Site-type contribution: 7mer-m8  
Context+ score: -0.211  
3' CGGAATCATGCACTCAGGGACT 5' (3'UTR)  
|||||  
5' TCCCTGAGACCTTAACCTGTG 3' (miRNA)
